# Supplementary material for: Solventless hybrid grafting of antimicrobial polymers for self-sterilizing surfaces
Source: Royal Society of Chemistry journal article supplement (doi:10.1039/c1jm12050f), 2011-01-01
Supplement: c1jm12050f.pdf [file c1jm12050f.pdf]

Supporting information for article:  
**Solventless hybrid grafting of antimicrobial polymers  
for self-sterilizing surfaces**

Yumin Ye,<sup>‡a</sup> Qing Song,<sup>‡a</sup> Yu Mao<sup>\*a</sup>

<sup>a</sup> *Departments of Biosystems Engineering, Oklahoma State University, Stillwater, OK  
74078, USA. E-mail: yu.mao@okstate.edu Tel: +1 405 744 4337; Fax: +1 405 744  
6059.*

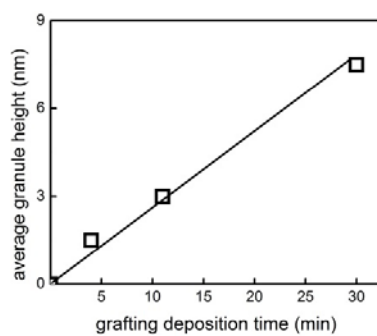

Fig. S1 The increase of the average granule height as a function of the grafting time.

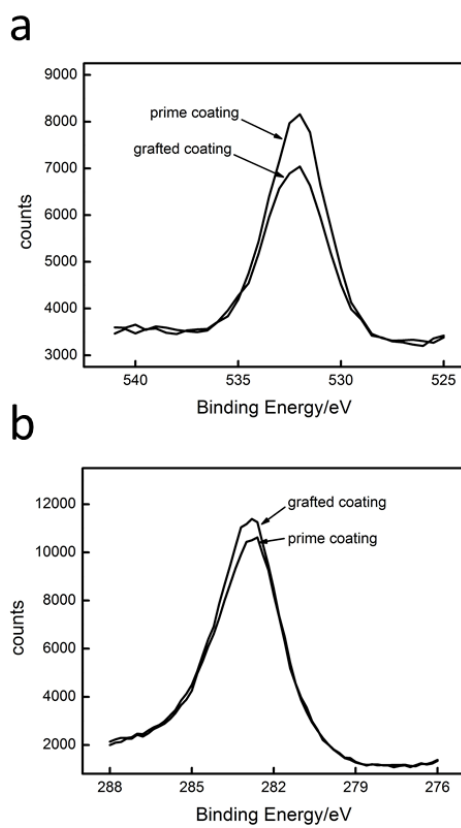

Fig.S2 O1s and C1s XPS spectra of the prime and grafted coatings.

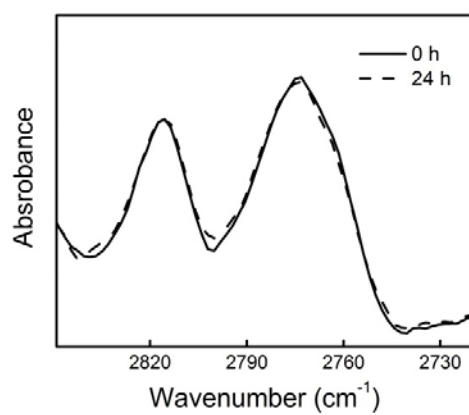

Fig.S3 FTIR spectra of the P(DMAMS-*co*-EGDA)-*g*-PDMAMS coatings before and after washing for 24 h.
